# Supplementary material for: A platinum–nickel bimetallic nanocluster ensemble-on-polyaniline nanofilm for enhanced electrocatalytic oxidation of dopamine
Source: Royal Society of Chemistry journal article supplement (doi:10.1039/c9nr09730a), 2020-01-01
Supplement: c9nr09730a1.pdf [file c9nr09730a1.pdf]

## Supplementary information

### Platinum-nickel bimetallic nanoclusters ensemble-on-polyaniline nanofilm for enhanced electrocatalytic oxidation of dopamine

Anupam Yadav<sup>a\*†</sup>, Richa Pandey<sup>b\*†</sup>, Ting-Wei Liao<sup>a</sup>, Vyacheslav S. Zharinov<sup>a</sup>, Kuo-Juei Hu<sup>a</sup>, Jerome Vernieres<sup>c</sup>, Richard E. Palmer<sup>c</sup>, Peter Lievens<sup>a</sup>, Didier Grandjean<sup>a\*</sup>, Yosi Shacham-Diamand<sup>d</sup>

<sup>a</sup> Quantum Solid State Physics, Department of Physics and Astronomy, KU Leuven, Celestijnenlaan 200D, B-3001 Leuven, Belgium

<sup>b</sup> Department of Engineering Physics, Faculty of Engineering, McMaster University, Hamilton- L8S 4L8, Canada

<sup>c</sup> College of Engineering, Swansea University, Bay Campus, Fabian Way, Swansea SA1 8EN, United Kingdom.

<sup>d</sup> Department of Physical Electronics, School of Electrical Engineering, and Department of Materials Science and Engineering, Faculty of Engineering, Tel Aviv University, Ramat Aviv, Tel Aviv- 69978, Israel

<sup>†</sup> Anupam Yadav and Richa Pandey contributed equally to the manuscript.

\* Emails to: [anupam.yadav@kuleuven.be](mailto:anupam.yadav@kuleuven.be), [pander2@mcmaster.ca](mailto:pander2@mcmaster.ca) and [didier.grandjean@kuleuven.be](mailto:didier.grandjean@kuleuven.be)

Keywords: Dopamine, Electrocatalysis, Pt-Ni Bimetallic Nanoclusters, Polyaniline, Flexible Hybrid Materials, Electrode Design

#### Supplementary information contains:

**Table S1.** Summary of structural results of Ni-K edge EXAFS refinements of pure Ni and Pt<sub>0.75</sub>Ni<sub>0.25</sub> NCs deposited on SiO<sub>2</sub>/Si wafer.

**Table S2.** Binding energies of different oxide and metal phases derived from Pt 4f and Ni 2p XPS spectra of Pt<sub>0.75</sub>Ni<sub>0.25</sub> NCs, pure Pt and pure Ni NCs deposited on Silica Wafer.

**Figure S1.** Best fit of Ni K-edge k<sup>3</sup>-weighted EXAFS spectra of Pt<sub>0.75</sub>Ni<sub>0.25</sub> NCs deposited on SiO<sub>2</sub>/Si wafer.

**Figure S2.** Best fit of Ni K-edge k<sup>3</sup>-weighted EXAFS spectra of pure Ni NCs deposited on SiO<sub>2</sub>/Si wafer.

**Figure S3.** XPS spectra of O1s core levels of Pt<sub>0.75</sub>Ni<sub>0.25</sub> NCs, pure Pt and pure Ni NCs deposited on a Silica Wafer.

**Figure S4.** Atomic mass contrast a HAADF-STEM image of a Pt<sub>0.75</sub>Ni<sub>0.25</sub> NC.

**Figure S5.** Randle Circuit model used for EIS data fitting where, Rs is the solution resistance, Cdl the double layer capacitance and Rct the charge transfer resistance.

**Figure S6.** Amperometric background signal of Pt<sub>0.75</sub>Ni<sub>0.25</sub> NCs (green) and Pt NCs (orange) supported PANI electrodes under DP free conditions.

**Figure S7.** Current vs. Concentration calibration chart of Pt (orange) and Pt<sub>0.75</sub>Ni<sub>0.25</sub> (green) hybrid electrodes from amperometric detection of DP in 0.1 M PBS.

**Figure S8.** Specific oxidation of DP in the presence of ascorbic acid (analyte selectivity test).

**Supplementary text.** Chronoamperometric measurements.

## Tables

**Table S1.** Summary of structural results of Ni-K edge EXAFS refinements of pure Ni and Pt<sub>0.75</sub>Ni<sub>0.25</sub> NCs deposited on SiO<sub>2</sub>/Si wafer.

|                |                                    | Pure Ni NCs           |                    |                                  | Pt <sub>0.75</sub> Ni <sub>0.25</sub> NCs |                    |                                  |
|----------------|------------------------------------|-----------------------|--------------------|----------------------------------|-------------------------------------------|--------------------|----------------------------------|
| N <sub>i</sub> | Shell                              | CN <sub>i</sub>       | R <sub>i</sub> (Å) | A <sub>i</sub> (Å <sup>2</sup> ) | CN <sub>i</sub>                           | R <sub>i</sub> (Å) | A <sub>i</sub> (Å <sup>2</sup> ) |
| 1              | Ni <sub>Ox</sub> -O                | 2.4(6)                | 2.015(2)           | 0.011(7)                         | 2.0(7)                                    | 1.99(2)            | 0.01(1)                          |
| 2              | Ni <sub>M</sub> -Ni <sub>M</sub>   | 1.8(8)                | 2.46(2)            | 0.009(8)                         | 0.8(5)                                    | 2.48(3)            | 0.01(2)                          |
| 3              | Ni <sub>M</sub> -Pt <sub>M</sub>   | -                     | -                  | -                                | 2(1)                                      | 2.66(3)            | 0.01(1)                          |
| 4              | Ni <sub>Ox</sub> -Ni <sub>Ox</sub> | 2(1)                  | 2.91 (2)           | 0.01(1)                          |                                           |                    |                                  |
| 5              | Ni <sub>M</sub> -Ni <sub>M</sub>   | 2(1)                  | 3.40(3)            | 0.01(1)                          |                                           |                    |                                  |
|                |                                    | E <sub>f</sub> =10(1) |                    | R=39%                            | E <sub>f</sub> = 9(2)                     |                    | R=57%                            |

**N<sub>i</sub>**: Shell number, **CN<sub>i</sub>**: Coordination number of atom in the N<sub>i</sub><sup>th</sup> shell, **R<sub>i</sub>**: Radial distance of atoms in the N<sub>i</sub><sup>th</sup> shell [Å], **A<sub>i</sub>**: Debye-Waller term of the N<sub>i</sub><sup>th</sup> shell ( $A=2\sigma^2$  with  $\sigma^2$ = Debye-Waller factor) [Å<sup>2</sup>], **Ni<sub>Ox</sub>**: Ni atoms in oxides and hydroxides, **Ni<sub>M</sub>**: Ni in metal phase. **E<sub>f</sub>**: contribution of the wave vector of the zero-photoelectron relative to the origin of k [eV], **R**: R factor (%).

**Table S2.** Binding energies of different oxide and metal phases derived from Pt 4f and Ni 2p XPS spectra of Pt<sub>0.75</sub>Ni<sub>0.25</sub>, pure Pt and pure Ni NCs deposited on SiO<sub>2</sub>/Si Wafer.

| NCs                                       | Chemical Phases       | BE (eV) |
|-------------------------------------------|-----------------------|---------|
| Pt <sub>0.75</sub> Ni <sub>0.25</sub> NCs | <b>4f 7/2</b>         |         |
|                                           | Pt <sup>0</sup>       | 71.1    |
|                                           | Pt <sup>+2</sup>      | 72.3    |
|                                           | Pt <sup>+4</sup>      | 73.0    |
|                                           | <b>2p 3/2</b>         |         |
|                                           | Ni <sup>0</sup>       | 852.3   |
|                                           | Ni <sup>+2</sup>      | 853.4   |
|                                           | Ni <sup>+2</sup> (OH) | 855.8   |
|                                           | Ni <sup>+3</sup>      | 860.9   |
| Pt NCs                                    | <b>4f 7/2</b>         |         |
|                                           | Pt <sup>0</sup>       | 71.4    |
|                                           | Pt <sup>+2</sup>      | 72.3    |
|                                           | Pt <sup>+4</sup>      | 73.9    |
|                                           | <b>2p 3/2</b>         |         |
| Ni NCs                                    | Ni <sup>0</sup>       | 852.1   |
|                                           | Ni <sup>+2</sup>      | 853.4   |
|                                           | Ni <sup>+2</sup> (OH) | 855.9   |
|                                           | Ni <sup>+3</sup>      | 860.5   |

## Figures

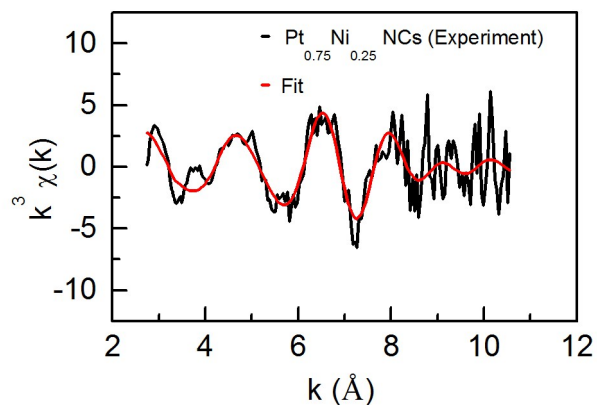

**Figure S1.** Best fit of Ni K-edge  $k^3$ -weighted EXAFS spectra of  $\text{Pt}_{0.75}\text{Ni}_{0.25}$  NCs deposited on  $\text{SiO}_2/\text{Si}$  wafer.

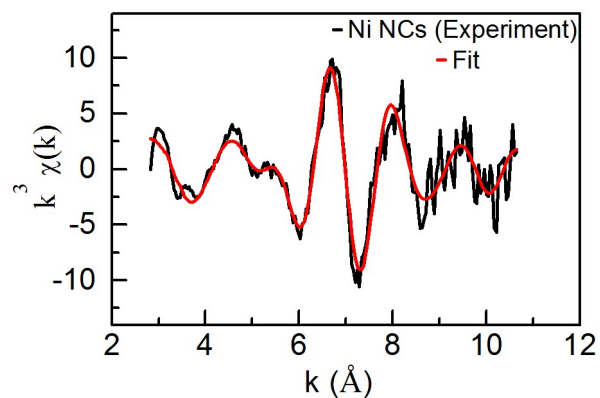

**Figure S2.** Best fit of Ni K-edge  $k^3$ -weighted EXAFS spectra of pure Ni NCs deposited on  $\text{SiO}_2/\text{Si}$  wafer.

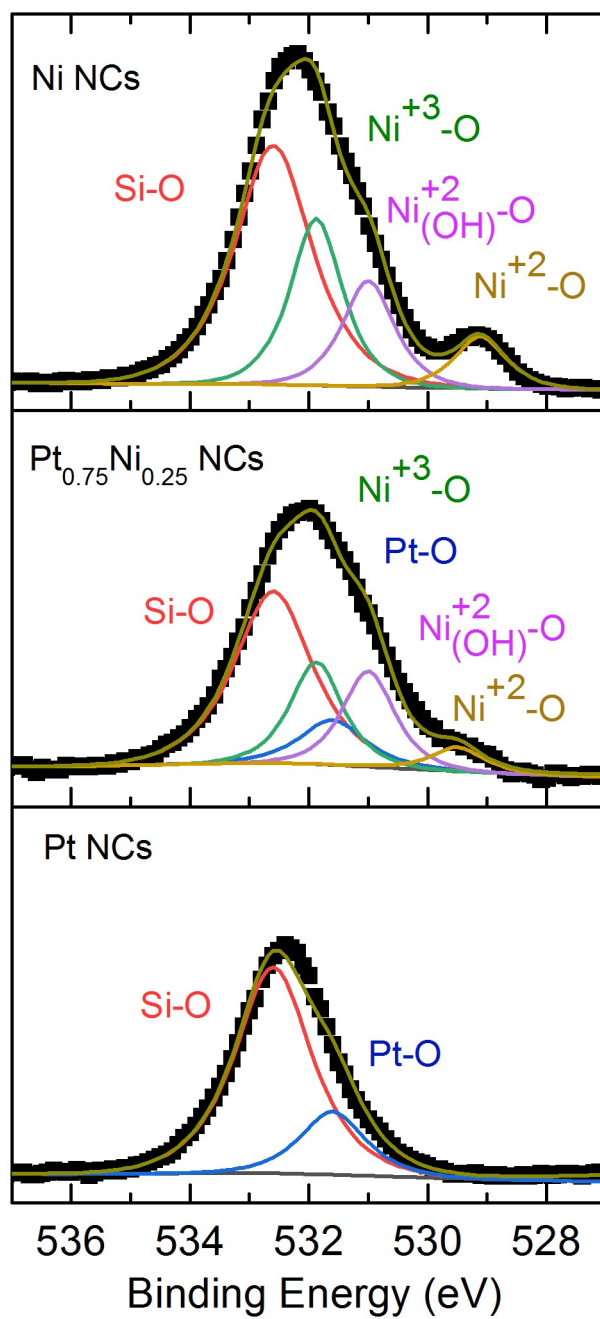

**Figure S3.** XPS spectra of O1s core levels of Pt<sub>0.75</sub>Ni<sub>0.25</sub>, Pt and Ni NCs on silica wafer.

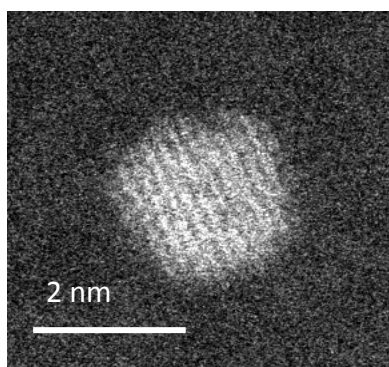

**Figure S4.** Atomic mass contrast HAADF-STEM image of a  $\text{Pt}_{0.75}\text{Ni}_{0.25}$  NC.

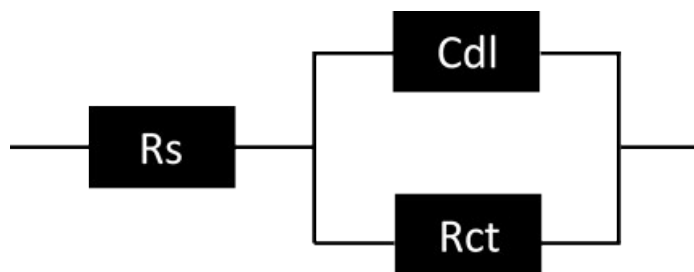

**Figure S5.** Randle Circuit model used for EIS data fitting where,  $R_s$  is the solution resistance,  $C_{dl}$  the double layer capacitance and  $R_{ct}$  the charge transfer resistance.

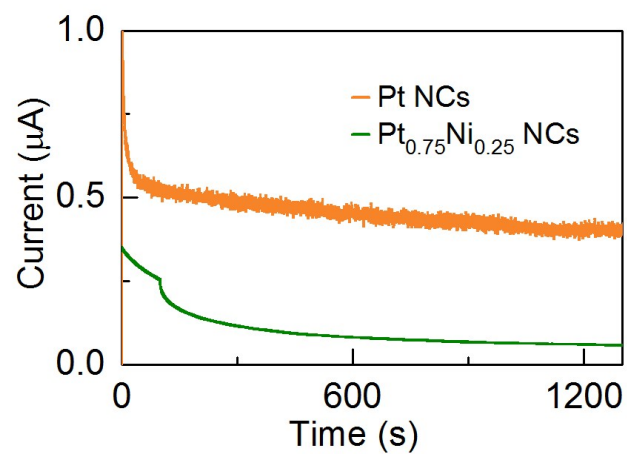

**Figure S6.** Amperometric background signal of Pt<sub>0.75</sub>Ni<sub>0.25</sub> NCs (green) and Pt NCs (orange) supported PANI electrodes under DP free conditions.

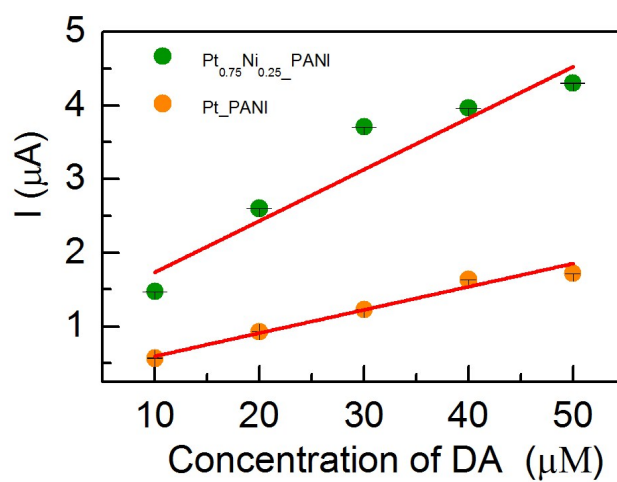

**Figure S7.** Current vs. Concentration calibration chart of Pt (orange) and Pt<sub>0.75</sub>Ni<sub>0.25</sub> (green) hybrid electrodes from amperometric detection of DP in 0.1 M PBS.

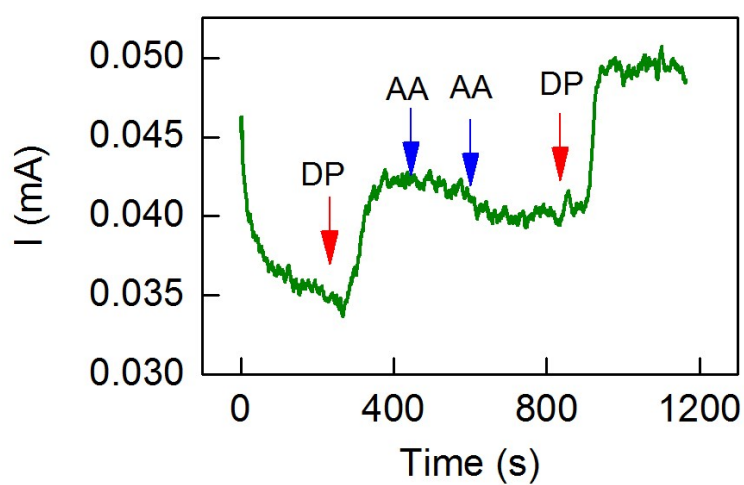

**Figure S8.** Specific oxidation of DP in the presence of ascorbic acid (analyte selectivity test).

### **Supplementary text**

Chronoamperometric measurements were performed under different concentrations of DP with PBS as electrolyte by applying for 1800s oxidation potentials of 0.19 V and 0.45 V for Pt<sub>0.75</sub>Ni<sub>0.25</sub> NCs and Pt NCs hybrid electrodes, respectively (Figure S5). A decrease in the background signal of Pt<sub>0.75</sub>Ni<sub>0.25</sub> NCs compared to that of Pt NCs is observed under DP free PBS condition.

A linear relationship was obtained between the current response and the concentration of the DP in the 5 to 50  $\mu\text{M}$  range (Figure 7). The linear regression equation can be applied with a correlation coefficient of  $R^2 = 0.91$  and  $0.97$  for Pt<sub>0.75</sub>Ni<sub>0.25</sub> and Pt, respectively. The sensitivity (slope of calibration curve) and limit of detection (LOD) calculated ( $S/N=3$ ) for the Pt<sub>0.75</sub>Ni<sub>0.25</sub> NCs-PANI hybrid was  $0.137\text{A}/\mu\text{M}\cdot\text{cm}^2$  and  $0.1\text{ }\mu\text{M}$ , respectively. The sensitivity of Pt<sub>0.75</sub>Ni<sub>0.25</sub> NCs was found to be around 4 times higher than that of pure Pt NCs ( $0.033\text{A}/\mu\text{M}\cdot\text{cm}^2$ ). Also, the LOD plummeted from  $0.6\text{ }\mu\text{M}$  (Pt NCs) to  $0.1\text{ }\mu\text{M}$  (Pt<sub>0.75</sub>Ni<sub>0.25</sub> NCs). The detection limitation of PANI Pt and Pt<sub>0.75</sub>Ni<sub>0.25</sub> NCs hybrid electrodes is in the human body DP reference range,<sup>1</sup> and is comparable and often better than most of the reported research works on bare Pt or CP modified with Pt.<sup>2,3,4</sup>

Beyond activity and stability, selectivity is an important criterion. Ascorbic Acid (AA) molecules always coexist in the physiological fluid along with DP and known to have similar oxidation potential causing strong interference in electrochemical detection of DP.<sup>5</sup> To test whether PANI- Pt<sub>0.75</sub>Ni<sub>0.25</sub> NCs electrodes can electro-oxidize AA, an amperometric experiment (Figure S8) was performed at 0.19 V. Addition of 1 mM AA into the electrolyte containing 100  $\mu\text{M}$  DP with a current response of  $0.08\text{ }\mu\text{A}$  did not produce any additional current response. This demonstrates that PANI-NCs hybrid electrodes are immune against interference from the AA molecule highlighting their highly specific DP detection capability.

### **References**

1. P. Capella, B. Ghasemzadeh, K. Mitchell and R. N. Adams, *Electroanalysis*, 1990, 2, 175-182.
2. C. Dhand, M. Das, M. Datta and B. D. Malhotra, *Biosensors and Bioelectronics*, 2011, 26, 2811-2821.
3. J.-M. Moon, N. Thapliyal, K. K. Hussain, R. N. Goyal and Y.-B. Shim, *Biosensors and Bioelectronics*, 2018, 102, 540-552.
4. K. Grennan, A. J. Killard, C. J. Hanson, A. A. Cafolla and M. R. Smyth, *Talanta*, 2006, 68, 1591-1600.
5. D. L. Robinson, A. Hermans, A. T. Seipel and R. M. Wightman, *Chemical Reviews*, 2008, 108, 2554-2584.
